# Supplementary material for: UV-induced synthesis of silver nanofiber networks as transparent electrodes
Source: Royal Society of Chemistry journal article supplement (doi:10.1039/c6tc01858k), 2016-01-01
Supplement: c6tc01858k1.pdf [file c6tc01858k1.pdf]

Table S1 Summary of the electrospinning formulas, fiber diameter, UV dosage, sheet resistances, and transmittances of the five samples.

| Sample Number | Electrospinning Formulas |                      | As-spun fiber average diameter (nm) | Standard deviation (nm) | UV irradiation (min) | Sheet Resistance ( $\Omega$ /sq) | Transmittance at 550 nm (%) |
|---------------|--------------------------|----------------------|-------------------------------------|-------------------------|----------------------|----------------------------------|-----------------------------|
|               | PMMA (wt%)               | Ag/PMMA weight ratio |                                     |                         |                      |                                  |                             |
| Ag/P_0.4      |                          | 0.4                  | 790                                 | 189                     |                      | 22297                            | 91                          |
| Ag/P_0.5      |                          | 0.5                  | 637                                 | 162                     |                      | 500                              | 83                          |
| Ag/P_0.6      | 15                       | 0.6                  | 762                                 | 168                     | 120                  | 154                              | 68                          |
| Ag/P_0.7      |                          | 0.7                  | 940                                 | 215                     |                      | 68                               | 32                          |
| Ag/P_0.8      |                          | 0.8                  | 1664                                | 514                     |                      | 50                               | 16                          |

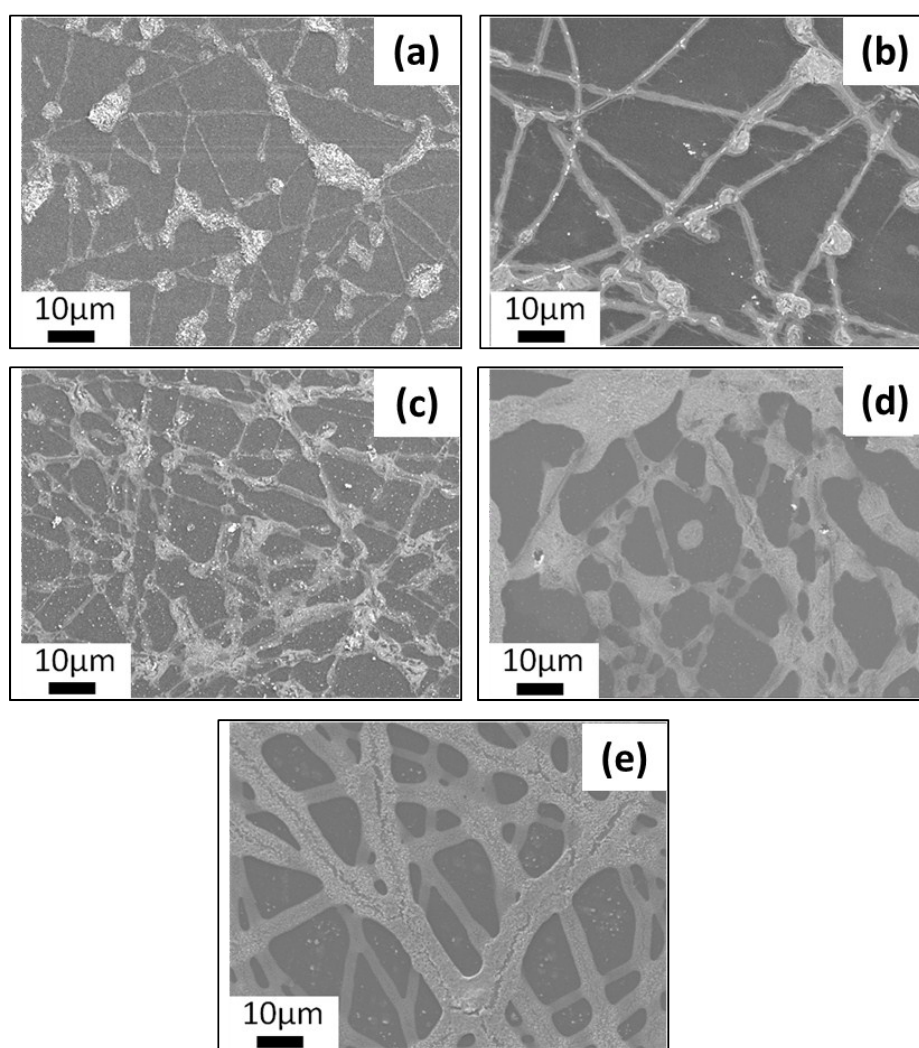

Fig. S1 SEM images of (a) Ag/P\_0.4, (b) Ag/P\_0.5, (c) Ag/P\_0.6, (d) Ag/P\_0.7, (e) Ag/P\_0.8 Ag nanofiber networks.

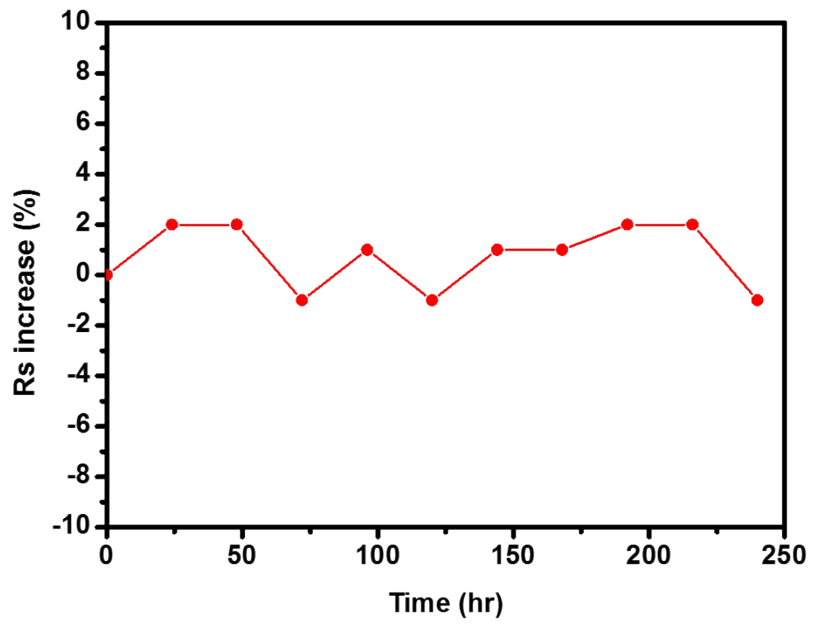

Fig. S2 The high temperature storage test of UV-120 sample. No obvious Rs change was observed during the test.
